# Supplementary material for: A novel octacyanido dicobalt(iii) building block for the construction of heterometallic compounds
Source: Royal Society of Chemistry journal article supplement (doi:10.1039/c9nj00420c), 2019-01-01
Supplement: c9nj00420c1.pdf [file c9nj00420c1.pdf]

Electronic Supplementary Information

**A novel octacyanido dicobalt(III) building block for the  
construction of heterometallic compounds†**

Maria-Gabriela Alexandru,<sup>\*a</sup> Nadia Marino,<sup>\*b</sup> Diana Visinescu,<sup>c</sup> Giovanni De Munno,<sup>b</sup>  
Marius Andruh,<sup>d</sup> Abdeslem Bentama,<sup>e</sup> Francesc Lloret,<sup>f</sup> and Miguel Julve<sup>\*f</sup>

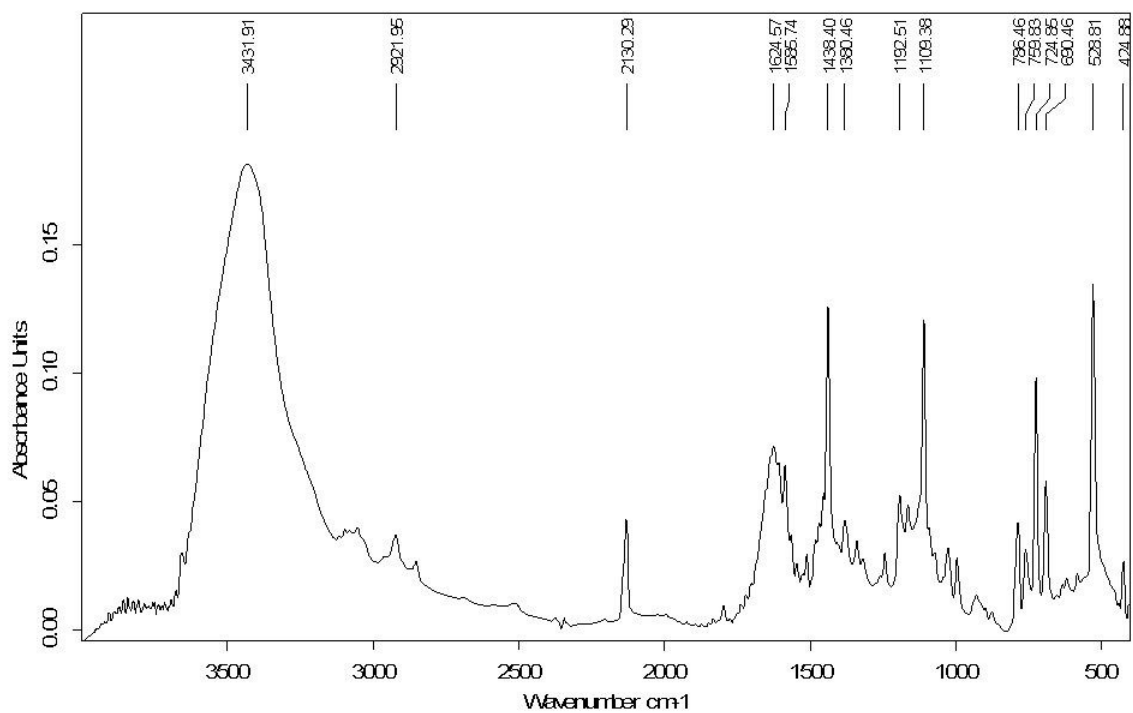

Fig. S1. FTIR spectrum of **1**

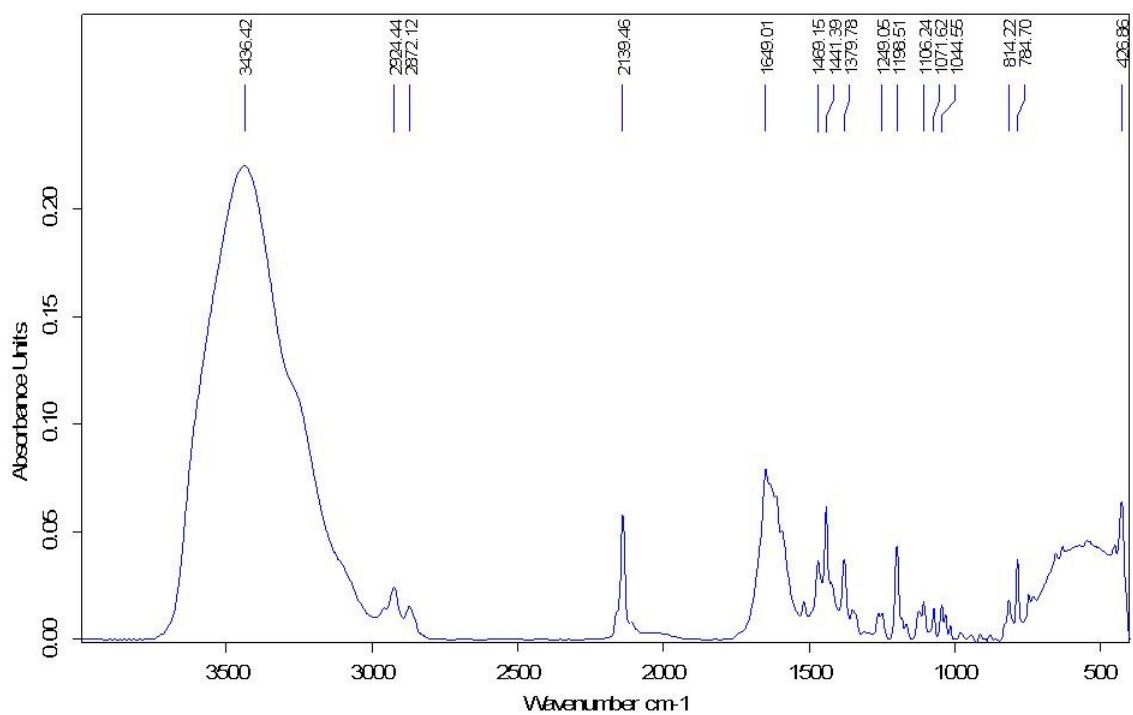

Fig. S2. FTIR spectrum of **2**.

**Table S1.** Selected bond lengths (Å) and angles (°) for **1**

|                   |            |                  |            |
|-------------------|------------|------------------|------------|
| Co(1)-N(1)        | 1.9659(14) | Co(1)-C(9)       | 1.8657(18) |
| Co(1)-N(2)        | 1.9603(13) | Co(1)-C(10)      | 1.8683(19) |
| Co(1)-C(8)        | 1.908(2)   | Co(1)-C(11)      | 1.908(2)   |
| C(9)-Co(1)-C(10)  | 87.64(8)   | C(9)-Co(1)-N(1)  | 95.71(7)   |
| C(9)-Co(1)-C(11)  | 88.26(8)   | C(10)-Co(1)-N(1) | 176.63(6)  |
| C(10)-Co(1)-C(11) | 89.37(8)   | C(11)-Co(1)-N(1) | 90.36(7)   |
| C(9)-Co(1)-C(8)   | 91.93(8)   | C(8)-Co(1)-N(1)  | 89.83(7)   |
| C(10)-Co(1)-C(8)  | 90.43(9)   | N(2)-Co(1)-N(1)  | 82.12(6)   |
| C(11)-Co(1)-C(8)  | 179.72(8)  | N(3)-C(8)-Co(1)  | 175.6(2)   |
| C(9)-Co(1)-N(2)   | 176.02(7)  | N(4)-C(9)-Co(1)  | 178.4(2)   |
| C(10)-Co(1)-N(2)  | 94.51(6)   | N(5)-C(10)-Co(1) | 178.71(17) |
| C(11)-Co(1)-N(2)  | 88.42(7)   | N(6)-C(11)-Co(1) | 177.3(2)   |
| C(8)-Co(1)-N(2)   | 91.40(7)   |                  |            |

**Table S2.** Selected bond lengths (Å) and angles (°) for **2<sup>a</sup>**

|                   |             |                   |            |                   |            |
|-------------------|-------------|-------------------|------------|-------------------|------------|
| Co(1)-N(1)        | 1.973(3)    | Co(2)-N(3)        | 1.967(3)   | Mn(1)-N(9)        | 2.277(4)   |
| Co(1)-N(2)        | 1.966(3)    | Co(2)-N(4)        | 1.975(3)   | Mn(1)-N(13)       | 2.210(2)   |
| Co(1)-C(15)       | 1.899(4)    | Co(2)-C(19)       | 1.905(4)   | Mn(1)-N(14)       | 2.297(4)   |
| Co(1)-C(16)       | 1.865(3)    | Co(2)-C(20)       | 1.871(4)   | Mn(1)-N(15)       | 2.306(4)   |
| Co(1)-C(17)       | 1.875(4)    | Co(2)-C(21)       | 1.873(4)   | Mn(1)-N(16)       | 2.292(4)   |
| Co(1)-C(18)       | 1.900(4)    | Co(2)-C(22)       | 1.900(5)   | Mn(1)-N(17)       | 2.308(4)   |
|                   |             |                   |            | Mn(1)-N(5a)       | 2.273(4)   |
| C(16)-Co(1)-C(17) | 89.02(15)   | C(20)-Co(2)-C(21) | 88.22(16)  | N(13)-Mn(1)-N(5a) | 90.81(12)  |
| C(16)-Co(1)-C(15) | 87.91(16)   | C(20)-Co(2)-C(22) | 89.50(18)  | N(13)-Mn(1)-N(9)  | 92.80(12)  |
| C(17)-Co(1)-C(15) | 90.70(16)   | C(21)-Co(2)-C(22) | 89.85(19)  | N(5a)-Mn(1)-N(9)  | 176.33(12) |
| C(16)-Co(1)-C(18) | 88.40(16)   | C(20)-Co(2)-C(19) | 86.09(16)  | N(13)-Mn(1)-N(16) | 142.97(16) |
| C(17)-Co(1)-C(18) | 90.1725(16) | C(21)-Co(2)-C(19) | 89.62(16)  | N(5a)-Mn(1)-N(16) | 93.16(14)  |
| C(15)-Co(1)-C(18) | 176.18(15)  | C(22)-Co(2)-C(19) | 175.57(16) | N(9)-Mn(1)-N(16)  | 84.34(13)  |
| C(16)-Co(1)-N(2)  | 176.84(14)  | C(20)-Co(2)-N(3)  | 177.35(15) | N(13)-Mn(1)-N(14) | 69.82(17)  |
| C(17)-Co(1)-N(2)  | 94.13(13)   | C(21)-Co(2)-N(3)  | 93.26(13)  | N(5a)-Mn(1)-N(14) | 88.07(14)  |
| C(15)-Co(1)-N(2)  | 91.99(13)   | C(22)-Co(2)-N(3)  | 92.70(15)  | N(9)-Mn(1)-N(14)  | 93.78(14)  |
| C(18)-Co(1)-N(2)  | 91.64(13)   | C(19)-Co(2)-N(3)  | 91.72(13)  | N(16)-Mn(1)-N(14) | 73.5(2)    |
| C(16)-Co(1)-N(1)  | 94.71(14)   | C(20)-Co(2)-N(4)  | 96.61(14)  | N(13)-Mn(1)-N(15) | 69.54(15)  |
| C(17)-Co(1)-N(1)  | 176.05(13)  | C(21)-Co(2)-N(4)  | 174.90(13) | N(5a)-Mn(1)-N(15) | 92.31(14)  |
| C(15)-Co(1)-N(1)  | 88.14(14)   | C(22)-Co(2)-N(4)  | 88.57(17)  | N(9)-Mn(1)-N(15)  | 88.34(14)  |
| C(18)-Co(1)-N(1)  | 91.15(14)   | C(19)-Co(2)-N(4)  | 92.33(13)  | N(16)-Mn(1)-N(15) | 146.83(19) |
| N(2)-Co(1)-N(1)   | 82.14(11)   | N(3)-Co(2)-N(4)   | 81.98(11)  | N(14)-Mn(1)-N(15) | 139.35(19) |
| N(5)-C(15)-Co(1)  | 174.9(3)    | N(9)-C(19)-Co(2)  | 176.4(3)   | N(13)-Mn(1)-N(17) | 141.32(16) |
| N(6)-C(16)-Co(1)  | 178.2(4)    | N(10)-C(20)-Co(2) | 177.6(4)   | N(5a)-Mn(1)-N(17) | 84.87(14)  |
| N(7)-C(17)-Co(1)  | 176.7(3)    | N(11)-C(21)-Co(2) | 175.7(3)   | N(9)-Mn(1)-N(17)  | 91.90(13)  |
| N(8)-C(18)-Co(1)  | 178.9(4)    | N(12)-C(22)-Co(2) | 178.0(5)   | N(16)-Mn(1)-N(17) | 75.70(18)  |
| C(15)-N(5)-Mn(1b) | 161.1(3)    | C(19)-N(9)-Mn(1)  | 159.0(3)   | N(14)-Mn(1)-N(17) | 148.0(2)   |
|                   |             |                   |            | N(15)-Mn(1)-N(17) | 72.26(17)  |

<sup>a</sup>Symmetry codes: (a) =  $x, y-1, z$ ; (b)  $x, y+1, z$ .
